# Supplementary material for: Generation and analysis of a mouse multitissue genome annotation atlas
Source: HighWire-hosted journal article supplement (doi:10.1101/gr.279217.124), 2024-10-23
Supplement: Supplemental_Tables.xlsx [file Supplemental_Tables.xlsx]

## Sheet: Table S1
		Testis	Brain	Spinal Cord	Eye	Stomach	Smooth Muscle	Heart	Spleen	Liver	Kidney	Lung	Salivary Gland
	R2C2	27007	23596	23803	22692	21209	19731	22961	20503	16968	18486	20121	17722
	Illumina RNAseq	34274	34649	25692	28952	24827	29640	28827	31588	27082	31164	28877	23409
	Supplemental Table S1: Genes detected as expressed by featureCounts.
	Number of genes with an RPM > 0 as defined by featureCounts is shown

## Sheet: Table S2
		R2C2
		Testis	Brain	Spinal Cord	Eye	Stomach	Smooth Muscle	Heart	Spleen	Liver	Kidney	Lung	Salivary Gland
	Testis	0.55_0.0	0.13_9.950411669303205e-204	0.07_6.192313353447187e-63	0.04_2.961261881393753e-18	0.02_6.58249284003677e-05	0.05_4.745052220653815e-36	0.06_2.2131725907170503e-51	0.01_0.0011666154439427972	0.01_0.00040270241958547813	0.05_1.1855516017185855e-33	0.02_0.0002398092611799822	0.01_0.124012527450877
Illumina	Brain	0.06_4.344215717935596e-48	0.49_0.0	0.33_0.0	0.08_9.9747397273779e-89	0.03_3.4364402332017995e-12	0.1_1.4614859696088042e-131	0.18_0.0	0.02_1.2085097810200274e-06	0.04_1.160990169591056e-25	0.09_4.8531739722120094e-110	0.03_8.857788708537527e-11	0.01_0.014377963350083338
	Spinal Cord	0.05_8.077056868445438e-29	0.47_0.0	0.59_0.0	0.06_4.626909746874707e-43	0.02_1.0979514583146221e-07	0.06_2.696712033906055e-50	0.15_6.932572791122819e-272	0.01_0.000841736648348524	0.06_1.5383808755890162e-49	0.08_1.2231334387280674e-89	0.02_1.2857556724270153e-07	0.01_0.11084147136736479
	Eye	0.02_1.254163605075641e-07	0.12_3.1278520296138972e-192	0.06_5.207797014395793e-40	0.49_0.0	0.02_3.861700832797514e-07	0.11_7.91706282950527e-162	0.06_1.7472233869402969e-46	0.01_0.0036873199946200253	0.02_4.969204960955831e-08	0.08_1.0350696650174797e-81	0.02_4.859092694838072e-08	0.01_0.004617803155648612
	Stomach	0.01_0.20618722587164465	0.03_1.4263195216399336e-09	0.02_0.0001515801189163522	0.01_0.06442414211781758	0.38_0.0	0.02_6.793720860167315e-05	0.03_2.038534976531537e-10	0.0_0.5327258482445807	0.0_0.23950180653181136	0.01_0.0006005745235734429	0.0_0.37408491316021975	0.01_0.12827645214558275
	Smooth Muscle	0.05_1.742917304925468e-29	0.22_0.0	0.13_6.252033971086241e-203	0.07_1.889643797984052e-56	0.13_3.705908077197327e-213	0.35_0.0	0.17_0.0	0.02_2.3746936627404987e-08	0.07_1.4193750456882455e-54	0.13_1.1121131786912093e-212	0.03_1.717808571419572e-14	0.01_0.0003973094312309282
	Heart	0.02_0.00019367326651384867	0.1_2.072717132089995e-138	0.06_1.7183518511895144e-51	0.03_5.887309587937743e-14	0.01_0.0031176530610060554	0.03_3.328835764283261e-16	0.27_0.0	0.02_0.00022759691089425103	0.01_0.0007989415258133076	0.05_5.093732146167467e-29	0.01_0.0013348788978692116	0.0_0.30511573352464433
	Spleen	0.08_1.1948841047776494e-76	0.24_0.0	0.16_1.1828686985975137e-303	0.08_1.7348480589304504e-76	0.05_4.952952822879219e-36	0.15_1.3126708419496993e-279	0.21_0.0	0.23_0.0	0.05_1.6625227891538767e-28	0.12_1.1997486260296428e-183	0.12_8.670958077762026e-195	0.02_3.841940839266034e-06
	Liver	0.01_0.0017429836330307862	0.07_1.502041726871253e-66	0.06_5.986654795480596e-44	0.02_7.09157857550605e-08	0.01_0.0035727445743228585	0.05_4.6254681439299784e-33	0.04_2.7643932749725865e-21	0.01_0.09581383676104631	0.48_0.0	0.04_7.87295356187965e-24	0.01_0.00524409329555614	0.0_0.35052787052350953
	Kidney	0.03_3.72649370814424e-12	0.14_9.478472592274729e-258	0.1_5.368700404907853e-114	0.04_2.8412135778030645e-21	0.02_2.834774624362133e-07	0.07_3.004878248773546e-66	0.16_2.88376e-319	0.01_0.0076361478909504560.03_2.5375335601427006e-13	0.04_1.7156245615278497e-18	0.47_0.0	0.02_4.429250935182247e-09	0.01_0.043732876109766665
	Lung	0.04_2.0069913670720236e-17	0.12_2.322059993156083e-179	0.08_1.355739514576627e-79	0.04_6.9280525075389615e-19	0.03_2.103011824375478e-09	0.06_1.1979864282120629e-51	0.1_8.923019603265185e-115	0.0_0.7928320083963037	0.03_2.9748838647987888e-12	0.08_4.142623713008716e-83	0.79_0.0	0.01_0.0410475215032805
	Salivary Gland	0.0_0.5276102548341034	0.01_0.023246156257458232	0.01_0.1824589168779786	0.0_0.4513463612188375	0.0_0.5866674804122632	0.01_0.1697999559041257	0.01_0.04670353064280166		0.0_0.6812674156757378	0.01_0.16015930735323097	0.0_0.7130953933114642	0.34_0.0
Supplemental Table S2: Pearson correlation between R2C2 and Illumina RNAseq based gene expression quantification
This table complements figure 3F. It contains the Pearson r values the heatmap is based on. Following those r values, separated by '_' are the associated p-values.

## Sheet: Table S3
	All_isoforms	Isoforms_per_gene	All_genes	Unannotated_genes	Annotated_genes
Combined	167079	2.42	68947	44011	24936
Testis	63948	2.39	26784	10527	16257
Brain	46677	2.51	18618	5139	13479
Spinal Cord	45056	2.38	18922	5634	13288
Eye	47477	2.21	21504	7660	13844
Stomach	29891	2.07	14416	2249	12167
Smooth Muscle	33747	2.28	14799	2745	12054
Heart	33007	2.17	15227	3487	11740
Spleen	37286	2.31	16164	4162	12002
Liver	26283	2.14	12261	1967	10294
Kidney	30941	2.27	13617	2079	11538
Lung	35054	2.37	14799	1921	12878
Salivary Gland	22727	1.89	12023	1815	10208
Supplemental Table S3: Characteristics of TAMI isoforms as definted by Sqanti3
For each tissue, the total number of isoforms, the average number of isoforms per gene, the total number and number of annotated and unannotated GENCODE genes associated with at least one TAMI isoform are listed

## Sheet: Table S4
	protein_coding	lncRNA	processed_pseudogene	TEC	unprocessed_pseudogene	transcribed_processed_pseudogene	transcribed_unprocessed_pseudogene	transcribed_unitary_pseudogene	pseudogene	unitary_pseudogene	snoRNA	misc_RNA	Mt_rRNA	translated_unprocessed_pseudogene	rRNA	TR_V_gene	TR_C_gene	IG_V_gene
Combined	73.05	19.55	2.67	2.65	0.83	0.43	0.38	0.08	0.08	0.04	0.02	0.03	0.01	0	0	0.04	0.02	0.05
Testis	77.25	17.19	2.33	1.2	0.93	0.49	0.3	0.1	0.09	0.03	0.02	0.02	0.01	0.01	0.01	0.01	0.01	0.01
Brain	90.74	6.65	1.02	0.99	0.08	0.22	0.14	0.04	0.02	0.01	0.01	0.01	0.01	0	0.01	0	0.01	0
Spinal Cord	90.62	6.7	1.16	0.84	0.09	0.25	0.14	0.06	0.05	0.01	0.01	0.03	0.02	0	0.01	0	0.01	0
Eye	90.01	7.16	1.11	1.03	0.09	0.24	0.17	0.06	0.04	0.01	0.01	0.03	0.01	0	0.01	0	0	0
Stomach	94.04	3.88	1.03	0.37	0.12	0.21	0.14	0.03	0.03	0	0.03	0.02	0.02	0	0.01	0	0	0.01
Smooth Muscle	92.64	4.85	1.22	0.47	0.17	0.25	0.18	0.02	0.02	0	0.04	0.02	0.02	0	0.01	0	0.01	0.02
Heart	91.65	6.01	1.12	0.61	0.09	0.2	0.15	0.03	0.03	0	0.01	0.03	0.02	0	0.01	0	0.01	0
Spleen	90.83	6.07	1.48	0.7	0.17	0.24	0.14	0.03	0.03	0	0.05	0.02	0.02	0	0.01	0.02	0.03	0.08
Liver	92.56	5.35	1.09	0.31	0.17	0.23	0.14	0.02	0.03	0	0.04	0.02	0.02	0	0.01	0	0	0
Kidney	92.09	5.69	1.16	0.36	0.11	0.21	0.15	0.02	0.04	0.01	0.03	0.03	0.02	0	0.01	0	0.01	0.01
Lung	92.68	5.19	1.05	0.36	0.1	0.21	0.13	0.04	0.04	0	0.04	0.03	0.02	0	0.01	0.01	0.03	0.02
Salivary Gland	93.65	4.23	1	0.35	0.19	0.19	0.14	0.01	0.01	0	0.05	0.02	0.02	0	0.01	0	0.02	0.02
Supplemental Table S4: Gene types associated with TAMI isoforms.
The percentage of gene_type attributes as defined by GENCODE is shown for all the genes for which TAMI identified at least one isoform in any given tissue

## Sheet: Table S5
		Percent	Average number of Exons	CAGE support of TSS	PolyA site at TTS	CAGE + PolyA	All Splice sites Canonical	Coding
Combined	full-splice_match	31.39	7.23	72.87	86.98	64.03	87.66	82.16
	novel_in_catalog	14.27	7.51	74.25	74.11	56.56	70.03	74.72
	novel_not_in_catalog	9.32	7.39	56.51	85.12	47.65	91.61	69.46
	incomplete-splice_match	12.67	5.21	49.65	66.82	25.82	75.65	68.5
Testis	full-splice_match	39.12	7.14	68.6	88.89	61.42	89.61	82.28
	novel_in_catalog	12.98	8.36	69.15	82.62	56.96	83.39	78.04
	novel_not_in_catalog	18.1	7.56	44.73	86.93	38.71	96.56	68.41
	incomplete-splice_match	8.24	6.03	46.01	74.94	29.86	85.23	72.99
Brain	full-splice_match	49.8	7.83	79.73	86.92	69.56	91.7	89.7
	novel_in_catalog	17.41	7.91	82.85	73.34	60.75	71.38	80.09
	novel_not_in_catalog	5.2	9.29	70.33	83.15	57.89	80.3	88.67
	incomplete-splice_match	13.95	5.69	60.72	57.36	28.1	81.33	74.2
Spinal Cord	full-splice_match	49.99	7.74	78.44	87.76	69.04	91.87	89.63
	novel_in_catalog	16.3	7.75	79.69	75.36	59.87	71.4	79.04
	novel_not_in_catalog	5.11	8.91	67.33	84.62	56.34	82.19	87.19
	incomplete-splice_match	13.46	5.29	52.99	62.89	26.51	76.38	70.31
Eye	full-splice_match	46.01	7.68	83.45	86.81	72.86	90.81	88.78
	novel_in_catalog	16.53	6.9	81.94	69.85	58.32	63.85	74.45
	novel_not_in_catalog	5.04	8.46	69.69	81.31	56.19	83.28	84.45
	incomplete-splice_match	13.24	5.44	64.57	55.54	29.56	83.1	73.67
Stomach	full-splice_match	62.39	8.18	87.99	89.67	79.03	93.59	92.17
	novel_in_catalog	14.6	7.5	89.09	72.73	64.89	66.7	77.11
	novel_not_in_catalog	4.6	9.36	78.76	88.65	69.75	81.31	88.65
	incomplete-splice_match	9.29	6.17	73.85	58.72	37.82	87.86	78.82
Smooth Muscle	full-splice_match	56.32	8.2	88.08	88.33	77.83	92.81	91.36
	novel_in_catalog	16.43	7.41	88.35	70.79	62.8	66.1	76.62
	novel_not_in_catalog	5.33	9.43	78	85.44	67.11	82.94	87.67
	incomplete-splice_match	11.78	6.25	74.48	55.81	35.66	89.61	79.39
Heart	full-splice_match	55.4	7.99	85.52	89.17	76.42	92.67	90.22
	novel_in_catalog	15.51	7.82	84.98	73.21	62.55	69.73	78.21
	novel_not_in_catalog	5.36	9.04	71.3	87.29	61.69	84.8	86.38
	incomplete-splice_match	10.99	5.94	66.21	59.65	33.24	83.77	75.69
Spleen	full-splice_match	51.36	7.79	87.04	87.28	76.16	91.66	89.51
	novel_in_catalog	17.88	6.83	86.08	71.59	62.1	65.59	74.97
	novel_not_in_catalog	4.43	8.68	80.51	83.05	67.01	81.23	86.5
	incomplete-splice_match	12.77	5.67	71.66	58.19	36.01	85.55	75.67
Liver	full-splice_match	60.75	8.05	87.51	90.29	79.1	94.01	90.68
	novel_in_catalog	14.09	7.71	86.71	75.26	65.45	71.58	79.36
	novel_not_in_catalog	6.16	8.48	72.95	88.45	64.18	86.04	85.67
	incomplete-splice_match	9.76	6.15	70.24	61.39	37.01	86.78	76.76
Kidney	full-splice_match	60.52	8	86.19	89.81	77.45	93.39	90.9
	novel_in_catalog	14.79	8.03	86.01	77.34	66.35	74.91	80.64
	novel_not_in_catalog	6.05	8.45	72.29	89.91	64.5	85.42	85.53
	incomplete-splice_match	10.14	5.98	64.37	65.17	35.72	83.11	75.53
Lung	full-splice_match	58.64	8.02	86.07	88.81	76.6	92.85	91.2
	novel_in_catalog	16.62	7.72	88.26	72.59	64.37	69.92	78.84
	novel_not_in_catalog	4.81	8.66	77.8	86.71	66.94	83.03	88.9
	incomplete-splice_match	12.46	5.76	62.97	60.56	30.44	82.12	74.3
Salivary Gland	full-splice_match	61.9	7.68	88.04	88.98	78.5	92.94	90.96
	novel_in_catalog	13.26	6.57	86.6	71.2	61.88	62.87	74.15
	novel_not_in_catalog	4.25	7.9	76.71	88.51	67.39	78.36	82.09
	incomplete-splice_match	10.6	5.66	65.93	61	33.11	82.99	73.24
Supplemtal Table S5: Characteristics of TAMI isoforms belonging to different structural categories.
For each tissue, the percent of isoforms categorized as each structural category is listed. For each structural category, the average number of exons, what percent of isoform TSSs overlap with CAGE peaks, what percent of isoform TTSs are associated with polyA sites, what percent of isoforms have both CAGE and polyA site support, what percent of isoforms contain only canonical splice sites, and wh…
